# Supplementary material for: Objective Assessment of Porcine Voice Acoustics for Laryngeal Surgical Modeling
Source: MDPI journal article supplement (doi:10.3390/app11104489), 2021-05-14
Supplement: s1 [file s1]

**Table S2.** Parameter abbreviations, expected change from pre- to post-surgery and reasoning behind this hypothesis.

| Parameter          | H1        | Reasoning                                                                                                                                                                                                                                                                                                             |
|--------------------|-----------|-----------------------------------------------------------------------------------------------------------------------------------------------------------------------------------------------------------------------------------------------------------------------------------------------------------------------|
| PF                 | decreases | The share of high frequencies decreases after surgery. Therefore we also expect a decrease of PF as it becomes more likely that the most dominant frequency is lower.                                                                                                                                                 |
| Q50                | decreases | Similar to PF, we also expect Q-Parameters to decrease due to a smaller share of high frequencies in the spectrum. The energy in the high frequencies decreases, resulting in a lower percentage of the total energy being in the high frequencies, which results in the 50% or 25% of the area being reached sooner. |
| Q50 <sub>2</sub>   | decreases |                                                                                                                                                                                                                                                                                                                       |
| Q50 <sub>10</sub>  | decreases |                                                                                                                                                                                                                                                                                                                       |
| Q50 <sub>min</sub> | decreases |                                                                                                                                                                                                                                                                                                                       |
| Q50W               | decreases |                                                                                                                                                                                                                                                                                                                       |
| Q25                | decreases |                                                                                                                                                                                                                                                                                                                       |
| Dur                | decreases | After surgery the larynx is still damaged and requires time to heal. This may make phonation more strenuous and therefore result in shorter squeals.                                                                                                                                                                  |
| Q50 <sub>n</sub>   | decreases | We noticed that higher frequencies tend to vanish especially in the end of the signal in post-surgery pigs. Therefore, later partial windows should have a lower share in high frequencies. As Q50 <sub>n</sub> denotes the partial window with the highest Q50 value we expect Q50 <sub>n</sub> to decrease.         |
| SF                 | increases | The decrease in energy in higher frequencies may result in a “flatter” spectrum in this frequency range. Therefore we expect Spectral Flatness to increase.                                                                                                                                                           |
| SF <sub>Q50</sub>  | increases |                                                                                                                                                                                                                                                                                                                       |
| Flux               | increases | Squeals may become more noisy and chaotic after surgery, therefore we expect the change in energy between signal windows and therefore Flux to increase.                                                                                                                                                              |
| RMSI               | increases | As the signal has less structure after surgery the relative sound intensity does change less over the course of the signal. This leads to a larger portion of the signal being closer to maximum height and hence may lead to an increased RMSI.                                                                      |
| HNR                | decreases | We expect squeals to become even less periodic after surgery and therefore HNR to decrease.                                                                                                                                                                                                                           |
